# Supplementary material
Source: PubMed Central journal article supplement (PMC1502485)
Supplement: pnas_0603796103_2.pdf [file pnas_0603796103_2.pdf]

## E. Longhorn sculpin AFP (type IV)

```
Mo_pancreas    MKFSLVATIVLLALAQGSFA▼QGAADLESLGQYFEEMKTKLIQDMTEIIRSQDLANQAQAF 60
Mo_AF026525    MKFSLVATIVLLALAQGSFA▼QGAADLESLGQYFEEMKTKLIQDMTEIIRSQDLANQAQAF 60
*****
Mo_pancreas    VEDKKTQLQPLVAQIQEQMKT VATNVEEQIRPLTANVQAHLQPQIDNFQKQMEAI IKKLT 120
Mo_AF026525    VEDKKTQLQPLVAQIQEQMKT VATNVEEQIRPLTANVQAHLQPQIDNFQKQMEAI IKKLT 120
*****
Mo_pancreas    DQTMAIEN 128
Mo_AF026525    DQTMAIEN 128
*****
```

## F. Saffron cod AFGP

```
Eg_pancreas    MAFLMRVLQLALLLAVGSQVHAYRLVLAGPQQHQQSLSEQLELLIAT▼PATAATPATAATP 60
ATAATAATAATAATAATAATAATAATAATAATAATAATAATAATAATAATAATAATAATAATA 120
ATAATAATAATAATAATAATAATAATAATAATAATAATAATAAAAAAAVF 161
```
