# Supplementary material
Source: PubMed Central journal article supplement (PMC1502485)
Supplement: pnas_0603796103_3.pdf [file pnas_0603796103_3.pdf]

**Table 1. Fish species, antifreeze type, and catch location**

| Antifreeze   | Order                    | Suborder        | Family           | Species                                | Abbrev.* | Common name          | Catch location              |    |           |                   |
|--------------|--------------------------|-----------------|------------------|----------------------------------------|----------|----------------------|-----------------------------|----|-----------|-------------------|
| None         | Perciformes              | Notothenoidei   | Bovichtidae      | <i>Bovichtus variegatus</i>            | Bv       | Thornfish            | New Zealand                 |    |           |                   |
| AFGP         | Perciformes              | Notothenoidei   | Nototheniidae    | <i>Dissostichus mawsoni</i>            | Dm       | Antarctic toothfish  | McMurdo Sound               |    |           |                   |
|              |                          |                 | Nototheniidae    | <i>Pagothenia borchgrevinki</i>        | Pb       | Bald notothen        | McMurdo Sound               |    |           |                   |
|              |                          |                 | Nototheniidae    | <i>Trematomus hansonii</i>             | Th       | Striped notothen     | McMurdo Sound               |    |           |                   |
|              |                          |                 | Nototheniidae    | <i>Trematomus loennbergii</i>          | Tl       | Deep-water notothen  | McMurdo Sound               |    |           |                   |
|              |                          |                 | Nototheniidae    | <i>Trematomus bernacchii</i>           | Tb       | Emerald notothen     | McMurdo Sound               |    |           |                   |
|              |                          |                 | Nototheniidae    | <i>Trematomus nicolai</i>              | Tn       | Spotted notothen     | McMurdo Sound               |    |           |                   |
|              |                          |                 | Artedidraconidae | <i>Pogonophryne cerebropogon</i>       | Pc       | Barbeled plunderfish | Ross Sea                    |    |           |                   |
|              |                          |                 | Artedidraconidae | <i>Histiodraco velifer</i>             | Hv       | Barbeled plunderfish | McMurdo Sound               |    |           |                   |
|              |                          |                 | Bathydraconidae  | <i>Gymnodraco acuticeps</i>            | Hv       | Naked dragonfish     | McMurdo Sound               |    |           |                   |
|              |                          |                 | Bathydraconidae  | <i>Parachaenichthys charcoti</i>       | Ga       | Dragon fish          | Antarctic peninsula         |    |           |                   |
|              |                          |                 | Channichthyidae  | <i>Chaenocephalus aceratus</i>         | Ca       | Blackfin icefish     | Antarctic peninsula         |    |           |                   |
|              |                          |                 | Channichthyidae  | <i>Chionodraco rastrospinosus</i>      | Cr       | Ocellated icefish    | Antarctic peninsula         |    |           |                   |
|              |                          |                 | AFGP             | Gadiformes                             | Gadoidei | Gadidae              | <i>Arctogadus glacialis</i> | Ag | Ice cod   | Western Greenland |
|              |                          |                 |                  |                                        |          | Gadidae              | <i>Boreogadus saida</i>     | Bs | Polar cod | Western Greenland |
| Gadidae      | <i>Eleginus gracilis</i> | Eg              |                  |                                        |          | Saffron cod          | Kotzebue, Alaska            |    |           |                   |
| AFP-type I   | Pleuronectiformes        | Pleuronectoidei | Pleuronectidae   | <i>Pleuronectes americanus</i>         | Pa       | Winter flounder      | Massachusetts coast         |    |           |                   |
| AFP-type II  | Clupeiformes             | Clupeoidei      | Clupeidae        | <i>Clupea harengus</i>                 | Ch       | Herring              | Barents Sea                 |    |           |                   |
|              | Salmoniformes            | Osmeroidei      | Osmeridae        | <i>Osmerus mordax</i>                  | Om       | Rainbow smelt        | New Brunswick               |    |           |                   |
| AFP-type III | Perciformes              | Zoarcoidei      | Zoarcidae        | <i>Pachycara brachycephalum</i>        | Pbr      | Antarctic eelpout    | McMurdo Sound               |    |           |                   |
|              |                          |                 | Zoarcidae        | <i>Lycodichthys dearborni</i>          | Ld       | Antarctic eelpout    |                             |    |           |                   |
|              |                          |                 | Zoarcidae        | <i>Macrozoarces americanus</i>         | Ma       | Atlantic Ocean pout  |                             |    |           |                   |
|              |                          |                 | Anarhichadidae   | <i>Anarhichas minor</i>                | Am       | Spotted wolffish     | Northern Norway             |    |           |                   |
| AFP-type IV  | Scorpaeniformes          | Cottoidei       | Cottidae         | <i>Myoxocephalus octodecemspinosus</i> | Mo       | Longhorn sculpin     | Massachusetts coast         |    |           |                   |

\*Species abbreviations used in figures and text.
