# Supplementary material
Source: PubMed Central journal article supplement (PMC1502485)
Supplement: pnas_0603796103_4.pdf [file pnas_0603796103_4.pdf]

**Table 2. Osmolarity, melting points, freezing points, and thermal hysteresis (antifreeze activity) of intestinal, stomach, and pancreatic fluids of Antarctic fishes**

| Taxa<br>(antifreeze type)            | Species                         | Intestinal Fluid     |                          |                           |                                 | N  |
|--------------------------------------|---------------------------------|----------------------|--------------------------|---------------------------|---------------------------------|----|
|                                      |                                 | Osmolarity<br>(mOsm) | Melting point<br>mp (°C) | Freezing point<br>fp (°C) | Thermal hysteresis<br>Th (°C) * |    |
|                                      | Seawater                        | 1025                 | -1.91                    | -1.91                     | —                               | —  |
| Antarctic<br>notothenioids<br>(AFGP) | <i>Dissostichus mawsoni</i>     | 667 ± 156            | -1.24 ± 0.29             | -2.27 ± 0.48              | 1.02 ± 0.28                     | 13 |
|                                      | <i>Pagothenia borchgrevinki</i> | 748 ± 27             | -1.39 ± 0.05             | -3.52 ± 0.56              | 2.12 ± 0.54                     | 4  |
|                                      | <i>Trematomus bernacchii</i>    | 603 ± 65             | -1.12 ± 0.12             | -2.76 ± 0.60              | 1.64 ± 0.50                     | 8  |
|                                      | <i>Trematomus hansonii</i>      | 646 ± 5              | -1.20 ± 0.01             | -2.91 ± 0.35              | 1.72 ± 0.34                     | 2  |
|                                      | <i>Trematomus nicolai</i>       | 684 ± 81             | -1.27 ± 0.15             | -2.54 ± 0.46              | 1.27 ± 0.37                     | 7  |
|                                      | <i>Gymnodraco acuticeps</i>     | 689 ± 43             | -1.28 ± 0.08             | -3.42 ± 0.21              | 2.15 ± 0.29                     | 4  |
| Antarctic zoarcids<br>(Type III AFP) | <i>Lycodichthys dearborni</i>   | 597 ± 86             | -1.11 ± 0.16             | -2.58 ± 0.52              | 1.47 ± 0.36                     | 2  |
|                                      |                                 | Stomach fluid        |                          |                           |                                 |    |
|                                      |                                 | Osmolarity<br>(mOsm) | Melting point<br>mp (°C) | Freezing point<br>fp (°C) | Thermal hysteresis<br>Th (°C) * | N  |
| Antarctic<br>notothenioids<br>(AFGP) | <i>Dissostichus mawsoni</i>     | 772 ± 151            | -1.43 ± 0.28             | -2.05 ± 0.61              | 0.62 ± 0.39                     | 3  |
|                                      | <i>Pagothenia borchgrevinki</i> | 1005 ± 133           | -1.87 ± 0.25             | -3.07 ± 0.81              | 1.20 ± 0.85                     | 7  |
|                                      | <i>Trematomus bernacchii</i>    | 963 ± 61             | -1.80 ± 0.11             | -2.01 ± 0.14              | 0.22 ± 0.04                     | 5  |
|                                      | <i>Trematomus nicolai</i>       | 1039 ± 21            | -1.93 ± 0.04             | -2.40 ± 0.12              | 0.47 ± 0.14                     | 5  |
| Antarctic zoarcid<br>(Type III AFP)  | <i>Lycodichthys dearborni</i>   | 632 ± 47             | -1.17 ± 0.09             | -1.88 ± 0.12              | 0.70 ± 0.12                     | 4  |
|                                      |                                 | Pancreatic fluid     |                          |                           |                                 |    |
|                                      |                                 | Osmolarity<br>(mOsm) | Melting point<br>mp (°C) | Freezing point<br>fp (°C) | Thermal hysteresis<br>Th (°C) * | N  |
| Antarctic<br>notothenioid<br>(AFGP)  | <i>Dissostichus mawsoni</i>     | 662 ± 81             | -1.23 ± 0.15             | -2.17 ± 0.36              | 0.94 ± 0.38                     | 10 |

Data presented as values ± standard deviation.

\*Thermal hysteresis (antifreeze activity) = melting point – freezing point.
