# Supplementary material
Source: PubMed Central journal article supplement (PMC1502485)
Supplement: pnas_0603796103_5.pdf [file pnas_0603796103_5.pdf]

**Table 3. Primer pairs for PCR amplification of cDNAs**

|                              | Forward                        | Reverse                           |
|------------------------------|--------------------------------|-----------------------------------|
| Notothenioid AFGP 5'         | GAGTCTTCTGAACATTCACCTGACACC    | GCWGCAAAAAWCAATGCAGSTGTTGC        |
| Notothenioid AFGP 3'         | GCAACASCTGCATTGWTTTTTGCWGC     | GTGTGTTAAGAGTCTTGATTGGCACCAG      |
| Type I AFP (winter flounder) | CCAGTGCTCCCTACAAGTTCT          | CTGTTGAATAAAGCTGAGAAGCTGT         |
| Type II AFP (herring)        | CAGCAGGTCATCAAGGTCAAAGTCATCTCC | GATTGTGTGTATGTTTGCATACTCTTCTGTGTT |
| Type II AFP (smelt)          | CAGCAGGTCGTCAAGGTCAAAGTCATCTCC | GTGTGTATGTTTGCATACTCATCTGTGTT     |
| Type III AFP                 | GCTTTCACTTCGTTCTCCGCTAA        | CTGAGCGTGCCAAGGAGTTTCTCC          |
| Type IV AFP                  | CCCAGTCCAACCTCCTCTTG           | GATGCGTTTCAGAGATTGCTG             |
| Saffron cod AFGP             | CTCGGATCCACCGTTCAAGTTGC        | CAGTCTCCTTGCTACAAG CAGGTTGACTTGGT |
| Trypsinogen                  | CTCAGCCAACCATGAGGTCTCTTGTATTCG | CTGCGATCACCATCTTACTCTGCTGCCTTTC   |
| EF1- $\alpha$                | GCAAGGGCTCCTTCAAGTACGCCTGGG    | CAACGGTCTGCCTCATGTACGCACAGC       |
