# Supplementary material
Source: PubMed Central journal article supplement (PMC1502485)
Supplement: pnas_0603796103_6.pdf [file pnas_0603796103_6.pdf]

**Table 4. GenBank accession numbers of cDNA sequences in this study**

| Species                                                   | cDNA                     | Accession no. |
|-----------------------------------------------------------|--------------------------|---------------|
| <i>Pogonophyrne cerebropogon</i>                          | AFGP 5', pancreatic      | DQ062435      |
|                                                           | AFGP 3', pancreatic      | DQ062436      |
| <i>Harpagifer antarcticus</i>                             | AFGP 5', pancreatic      | DQ062437      |
|                                                           | AFGP 3', pancreatic      | DQ062438      |
| <i>Gymnodraco acuticeps</i>                               | AFGP 5', pancreatic      | DQ062439      |
|                                                           | AFGP 3', pancreatic      | DQ062440      |
| <i>Parachaenichthys charcoti</i>                          | AFGP 5', pancreatic      | DQ062441      |
|                                                           | AFGP 3', pancreatic      | DQ062442      |
| <i>Chaenocephalus aceratus</i>                            | AFGP 5', pancreatic      | DQ062443      |
|                                                           | AFGP 3', pancreatic      | DQ062444      |
| <i>Pleuronectes americanus</i> (winter flounder)          | Type I AFP, pancreatic   | DQ062445      |
| <i>Clupea harengus</i> (herring)                          | Type II AFP, liver       | DQ062446      |
|                                                           | Type II AFP, pancreatic  | DQ062447      |
| <i>Osmerus mordax</i> (rainbow smelt)                     | Type II AFP, pancreatic  | DQ062448      |
| <i>Macrozoarces americanus</i> (Atlantic Ocean pout)      | Type III AFP, pancreatic | DQ062449      |
|                                                           | Type III AFP, pancreatic | DQ062450      |
| <i>Lycodichthys dearborni</i> (Antarctic eelpout)         | Type III AFP, liver      | DQ062451      |
|                                                           | Type III AFP, pancreatic | DQ062452      |
| <i>Pachycara brachycephalum</i> (Antarctic eelpout)       | Type III AFP, liver      | DQ062453      |
|                                                           | Type III AFP, pancreatic | DQ062454      |
| <i>Anarhichas minor</i> (spotted wolffish)                | Type III AFP, liver      | DQ062455      |
|                                                           | Type III AFP, pancreatic | DQ062456      |
| <i>Myoxocephalus octodecemspinosus</i> (longhorn sculpin) | Type IV AFP, pancreatic  | DQ062457      |
| <i>Eleginus gracilis</i> (saffron cod)                    | AFGP, pancreatic         | DQ062458      |
| <i>Dissostichus mawsoni</i>                               | Trypsinogen, pancreatic  | DQ062459      |
| <i>Trematomus bernacchii</i>                              | EF1-alpha subunit        | DQ394083      |
